# Supplementary material for: MoS2/cellulose-doped ZnO nanorods for catalytic, antibacterial and molecular docking studies
Source: Royal Society of Chemistry journal article supplement (doi:10.1039/d1na00648g), 2021-11-01
Supplement: d1na00648g1.pdf [file d1na00648g1.pdf]

## **MoS<sub>2</sub>/Cellulose-doped ZnO nanorods for catalytic, antibacterial and molecular docking studies**

Muhammad Ikram<sup>a</sup>, Muhammad Imran<sup>b</sup>, Shoukat Hayat<sup>c</sup>, Anum Shahzadi<sup>d</sup>, Ali Haider<sup>e</sup>, Sadia Naz<sup>f</sup>, Anwar Ul-Hamid<sup>g</sup>, Walid Nabgan<sup>h</sup>, Iqra Fazal<sup>c</sup>, Salamat Ali<sup>c</sup>

<sup>a</sup>Solar Cell Application Research Lab, Department of Physics, Government College University Lahore, Lahore, 54000, Punjab, Pakistan

<sup>b</sup>State Key Laboratory of Chemical Resource Engineering, Beijing Advanced Innovation Centre for Soft Matter Science and Engineering, Beijing Engineering Center for Hierarchical Catalysts, Beijing University of Chemical Technology, Beijing 100029, China

<sup>c</sup>Department of Physics, Riphah Institute of Computing and Applied Sciences (RICAS), Riphah International University, 14 Ali Road, Lahore, Pakistan

<sup>d</sup>Faculty of Pharmacy, University of the Lahore, Lahore, Pakistan

<sup>e</sup>Department of Clinical Medicine and Surgery, University of Veterinary and Animal Sciences, Lahore 54000, Punjab, Pakistan

<sup>f</sup>Tianjin Institute of Industrial Biotechnology, Chinese Academy of Sciences, Tianjin 300308, China.

<sup>g</sup>Core Research Facilities, King Fahd University of Petroleum & Minerals, Dhahran, 31261, Saudi Arabia

<sup>h</sup>School of Chemical and Energy Engineering, Faculty of Engineering, Universiti Teknologi Malaysia, 81310 Skudai, Johor, Malaysia.

Corresponding Authors: <sup>a</sup>[dr.muhammadikram@gcu.edu.pk](mailto:dr.muhammadikram@gcu.edu.pk); <sup>g</sup>[anwar@kfupm.edu.sa](mailto:anwar@kfupm.edu.sa),

<sup>h</sup>[wnabgan@gmail.com](mailto:wnabgan@gmail.com)

**Table S1:** Comparative antimicrobial evaluation of MoS<sub>2</sub>/CNC-doped ZnO NRs

| Material                            | Concentration | Inhibition zone (mm) |                | Reference    |
|-------------------------------------|---------------|----------------------|----------------|--------------|
|                                     |               | <i>S. aureus</i>     | <i>E. coli</i> |              |
| MoS <sub>2</sub> /ZnO               | 2 mg          |                      | 45% reduction  | [1]          |
| Zr doped MoS <sub>2</sub>           | 1 mg          | 1                    | 2.95           | [2]          |
| MoS <sub>2</sub>                    | 100 mg        | 25                   | 27             | [3]          |
| Chitosan-MoS <sub>2</sub>           | 100 mg        | 32                   | 35             |              |
| MoS <sub>2</sub> -ZnO-rGO           | 100 µg        | 18.3 ± 1.3           | 20.6 ± 1.5     | [4]          |
| Mg:ZnO                              | 1000 µg       | 4.15                 | 8.65           | [5]          |
| 10% Ag-MoS <sub>2</sub>             | 1000 µg       | 6.05                 | 2.95           | [6]          |
| MoS <sub>2</sub> /CNC-doped ZnO NRs | 1 mg          | 12.55                | 6.5            | Present Work |

## REFERENCES

- [1] Awasthi, G.P., Adhikari, S.P., Ko, S., Kim, H.J., Park, C.H. and Kim, C.S., 2016. Facile synthesis of ZnO flowers modified graphene like MoS<sub>2</sub> sheets for enhanced visible-light-driven photocatalytic activity and antibacterial properties. *Journal of Alloys and Compounds*, 682, pp.208-215.
- [2] Ikram, M., Tabassum, R., Kumar, U., Ali, S., Ul-Hamid, A., Haider, A., Raza, A. and Imran, M., 2020. Promising performance of chemically exfoliated Zr-doped MoS<sub>2</sub> nanosheets for catalytic and antibacterial applications. *RSC Advances*, 10(35), pp.20559-20571.
- [3] Kasinathan, K., Murugesan, B., Pandian, N., Mahalingam, S., Selvaraj, B. and Marimuthu, K., 2020. Synthesis of biogenic chitosan-functionalized 2D layered MoS<sub>2</sub> hybrid nanocomposite and its performance in pharmaceutical applications: in-vitro antibacterial and anticancer activity. *International journal of biological macromolecules*, 149, pp.1019-1033.
- [4] Priyadharsan, A., Shanavas, S., Vasanthakumar, V., Balamuralikrishnan, B. and Anbarasan, P.M., 2018. Synthesis and investigation on synergetic effect of rGO-ZnO decorated MoS<sub>2</sub> microflowers with enhanced photocatalytic and antibacterial activity. *Colloids and Surfaces A: Physicochemical and Engineering Aspects*, 559, pp.43-53.

[5] Ikram, M., Aslam, S., Haider, A., Naz, S., Ul-Hamid, A., Shahzadi, A., Ikram, M., Haider, J., Ahmad, S.O.A. and Butt, A.R., 2021. Doping of Mg on ZnO Nanorods Demonstrated Improved Photocatalytic Degradation and Antimicrobial Potential with Molecular Docking Analysis. *Nanoscale Research Letters*, 16(1), pp.1-16.

[6] Kumar, U., Hassan, J., Naz, S., Haider, A., Raza, A., Ul-Hamid, A., Haider, J., Shahzadi, I., Ahmad, I. and Ikram, M., 2021. Silver decorated 2D nanosheets of GO and MoS<sub>2</sub> serve as nanocatalyst for water treatment and antimicrobial applications as ascertained with molecular docking evaluation. *Nanotechnology*, 32(25), p.255704.
